# Supplementary material for: Host and symbiont genetic contributions to fitness in a Trichogramma–Wolbachia symbiosis
Source: PeerJ. 2018 Apr 19;6:e4655. doi: 10.7717/peerj.4655 (PMC5911386; doi:10.7717/peerj.4655)
Supplement: Supplemental Information 5 — Analysis of the pupal survival (+/− 1se) of the four original experimental lines (shaded) and of the 12 novel combinations of Wolbachia (W) and host (T) (see Fig. 4). [file peerj-06-4655-s005.docx]

**Supp. Table 2c.** Analysis of thepupalsurvival (+/- 1se) of the four original experimental lines (shaded) and of the 12 novel combinations of *Wolbachia* (*W*) and host (*T*) (see Figure 4).

|  | ***T1*** | ***T2*** | ***T3*** | ***T4*** | ***Total (novel)1*** | ***Total2*** |
| --- | --- | --- | --- | --- | --- | --- |
| ***W1*** | 0.88 (0.06) | 0.85 (0.06) | 0.82 (0.07) | 0.87 (0.06) | *0.84 (0.04)* | *0.85 (0.03)* |
| ***W2*** | 0.87 (0.07) | 0.88 (0.06) | 0.84 (0.07) | 0.83 (0.07) | *0.84 (0.04)* | *0.85 (0.03)* |
| ***W3*** | 0.86 (0.06) | 0.86 (0.06) | 0.82 (0.07) | 0.83 (0.07) | *0.85 (0.04)* | *0.84 (0.03)* |
| ***W4*** | 0.87 (0.06) | 0.87 (0.06) | 0.79 (0.07) | 0.86 (0.06) | *0.84 (0.04)* | *0.85 (0.03)* |
| ***Total N(O)1*** | *0.87 (0.04)* | *0.86 (0.03)* | *0.82 (0.04)* | *0.84 (0.04)* | ***0.84(0.86)*** |  |
| ***Total2*** | *0.87 (0.03)* | *0.86 (0.03)* | *0.82 (0.03)* | *0.85 (0.03)* |  | ***0.85*** |

*1.* *Total(novel)* are the proportions of the novel (non-coevolved) Host-*Wolbachia* combinations for host (columns) and *Wolbachia* (rows). The overall proportion values for the novel infections (bold) and for the coevolved lines (bold, in parentheses and shaded) are also given. *2. Total* are the column and row proportions of all Host-*Wolbachia* combinations. The overall proportion value is in bold.
